# Supplementary material for: Rapid discovery and global characterization of multiple constituents from Kai-Xin-San using an integrated MSEdata acquisition mode strategy based on ultra-performance liquid chromatography coupled to electrospray ionization/quadrupole-time-of-flight mass spectrometry
Source: Royal Society of Chemistry journal article supplement (doi:10.1039/c4ay01954g), 2014-10-06
Supplement: c4ay01954g1.pdf [file c4ay01954g1.pdf]

**Supplementary table 1. Characterization of chemical constituents of KXS by UPLC/QTOF MS.**

| No. | Rt/<br>min | Compound Name                                     | Positive  |      | Negativeion |      | Formula                                                        | MW(Da)   | Origin |
|-----|------------|---------------------------------------------------|-----------|------|-------------|------|----------------------------------------------------------------|----------|--------|
|     |            |                                                   | (m/z)     |      | (m/z)       |      |                                                                |          |        |
|     |            |                                                   | Indicated | ppm  | Indicated   | ppm  |                                                                |          |        |
| 1   | 0.83       | Asparagine                                        | —         | —    | 131.0739    | 2.9  | C <sub>4</sub> H <sub>7</sub> NO <sub>4</sub>                  | 132.0535 | d      |
| 2   | 0.83       | Bergapten                                         | —         | —    | 215.0344    | 0    | C <sub>12</sub> H <sub>8</sub> O <sub>4</sub>                  | 216.0423 | d      |
| 3   | 0.85       | Argininy-fructosyl-glucose                        | 499.2157  | 4.0  | —           | —    | C <sub>18</sub> H <sub>34</sub> N <sub>4</sub> O <sub>12</sub> | 498.2173 | a      |
| 4   | 0.86       | Isopimpinellin                                    | —         | —    | 245.0450    | -1.6 | C <sub>13</sub> H <sub>10</sub> O <sub>5</sub>                 | 246.0528 | d      |
| 5   | 0.90       | Mannose                                           | —         | —    | 179.0556    | 1.1  | C <sub>6</sub> H <sub>12</sub> O <sub>6</sub>                  | 180.0634 | a      |
| 6   | 0.93       | Valine                                            | 118.0863  | 2.9  | —           | —    | C <sub>5</sub> H <sub>11</sub> NO <sub>2</sub>                 | 117.0790 | d      |
| 7   | 0.93       | 5-Hydroxymethylfurfural                           | 127.0395  | 3.4  | —           | —    | C <sub>6</sub> H <sub>6</sub> O <sub>3</sub>                   | 126.0317 | d      |
| 8   | 0.93       | Dimethyl(R)-(+)-malate                            | 163.0402  | 2.3  | 161.0398    | 5    | C <sub>6</sub> H <sub>10</sub> O <sub>5</sub>                  | 162.0528 | b      |
| 9   | 0.97       | 2,3-Dihydro-3,5-dihydroxy-6-methyl-4H-pyran-4-one | 145.0501  | 1.3  | —           | —    | C <sub>6</sub> H <sub>8</sub> O <sub>4</sub>                   | 144.0423 | d      |
| 10  | 1.12       | Sucrose                                           | —         | —    | 341.1084    | -9.1 | C <sub>12</sub> H <sub>22</sub> O <sub>11</sub>                | 342.1162 | a+c    |
| 11  | 1.53       | Nicotinic acid                                    | 124.0399  | -9.7 | —           | —    | C <sub>6</sub> H <sub>5</sub> NO <sub>2</sub>                  | 123.0320 | a      |
| 12  | 1.62       | Benzoic acid                                      | 123.0446  | 1.8  | —           | —    | C <sub>7</sub> H <sub>6</sub> O <sub>2</sub>                   | 122.0368 | d      |
| 13  | 1.62       | Adenine                                           | 136.0623  | 1.2  | —           | —    | C <sub>5</sub> H <sub>5</sub> N <sub>5</sub>                   | 135.0545 | b      |
| 14  | 1.62       | L-Uridine                                         | —         | —    | 243.0637    | 3.3  | C <sub>9</sub> H <sub>12</sub> N <sub>2</sub> O <sub>6</sub>   | 244.0695 | b      |
| 15  | 1.62       | Adenosine                                         | 268.1046  | 1.8  | —           | —    | C <sub>10</sub> H <sub>13</sub> N <sub>5</sub> O <sub>4</sub>  | 267.0968 | a      |
| 16  | 1.66       | Phenyl acetate                                    | 137.0603  | 2.4  | —           | —    | C <sub>8</sub> H <sub>8</sub> O <sub>2</sub>                   | 136.0524 | c      |
| 17  | 2.04       | Sibiricose A3                                     | —         | —    | 461.1295    | 2.4  | C <sub>19</sub> H <sub>26</sub> O <sub>13</sub>                | 462.1373 | c      |
| 18  | 2.04       | Gentisin                                          | —         | —    | 257.0450    | 0.8  | C <sub>14</sub> H <sub>10</sub> O <sub>5</sub>                 | 258.0528 | c      |
| 19  | 2.09       | Kaempferol                                        | 287.0556  | -8.4 | 285.0399    | -2.1 | C <sub>15</sub> H <sub>10</sub> O <sub>6</sub>                 | 286.0477 | a      |
| 20  | 2.19       | Raffinose                                         | —         | —    | 503.1612    | 6.4  | C <sub>18</sub> H <sub>32</sub> O <sub>16</sub>                | 504.1690 | a      |
| 21  | 2.24       | Sibiricose A6                                     | —         | —    | 547.1663    | 3.7  | C <sub>23</sub> H <sub>32</sub> O <sub>15</sub>                | 548.1741 | c      |
| 22  | 2.26       | Sibiricose A5                                     | —         | —    | 517.1557    | 2.1  | C <sub>22</sub> H <sub>30</sub> O <sub>14</sub>                | 518.1636 | c      |
| 23  | 2.41       | Sibiricose A1                                     | —         | —    | 547.1663    | -1.5 | C <sub>23</sub> H <sub>32</sub> O <sub>16</sub>                | 548.1741 | c      |
| 24  | 2.46       | Vitamin B2                                        | 377.1461  | -9.0 | —           | —    | C <sub>17</sub> H <sub>20</sub> N <sub>4</sub> O <sub>6</sub>  | 376.1383 | a      |
| 25  | 2.54       | Tatarine C                                        | 325.1400  | -0.3 | —           | —    | C <sub>15</sub> H <sub>20</sub> N <sub>2</sub> O <sub>6</sub>  | 324.1321 | d      |
| 26  | 2.63       | Salicylic acid                                    | —         | —    | 137.0239    | -1.9 | C <sub>7</sub> H <sub>6</sub> O <sub>3</sub>                   | 138.0317 | a      |
| 27  | 2.73       | Lancerin                                          | 407.0978  | -2.2 | 405.0822    | 6.9  | C <sub>19</sub> H <sub>18</sub> O <sub>10</sub>                | 406.0900 | c+d    |
| 28  | 2.95       | PolygalaxanthoneIII                               | 569.1507  | 3.5  | 567.1349    | -5.3 | C <sub>25</sub> H <sub>28</sub> O <sub>15</sub>                | 568.1428 | c      |

|    |       |                                         |          |      |           |      |                                                 |           |   |
|----|-------|-----------------------------------------|----------|------|-----------|------|-------------------------------------------------|-----------|---|
| 29 | 3.17  | Sibiricose A2                           | —        | —    | 561.1878  | -2.5 | C <sub>24</sub> H <sub>34</sub> O <sub>15</sub> | 562.1898  | c |
| 30 | 3.21  | N-Acetyl-D-glucosamine                  | 221.0899 | -2.5 | —         | —    | C <sub>8</sub> H <sub>15</sub> NO <sub>6</sub>  | 221.0899  | c |
| 31 | 3.62  | 1-(3,4-Dimethoxyphenyl)ethan-1-one      | 181.0865 | -2.2 | —         | —    | C <sub>10</sub> H <sub>12</sub> O <sub>3</sub>  | 180.0786  | c |
| 32 | 4.51  | 2,4,5-Trimethoxybenzoic acid            | 213.0737 | 1.8  | —         | —    | C <sub>10</sub> H <sub>12</sub> O <sub>5</sub>  | 212.0685  | d |
| 33 | 4.64  | Polygalaxanthone V                      | 583.1663 | 0.9  | 581.1507  | 2.8  | C <sub>26</sub> H <sub>30</sub> O <sub>15</sub> | 582.1585  | c |
| 34 | 4.88  | Polygalaxanthone VII                    | 613.1769 | -0.2 | 611.1612  | 4.3  | C <sub>27</sub> H <sub>32</sub> O <sub>16</sub> | 612.1690  | c |
| 35 | 5.14  | 3,4-Dimethoxycinnamic acid              | 209.0814 | -1.3 | —         | —    | C <sub>11</sub> H <sub>12</sub> O <sub>4</sub>  | 208.0736  | c |
| 36 | 5.57  | 2,5-Dimethyl-7-hydroxy chromone         | 191.0708 | -3.1 | —         | —    | C <sub>11</sub> H <sub>10</sub> O <sub>3</sub>  | 190.0630  | a |
| 37 | 5.81  | Tenuifoliside B                         | —        | —    | 693.2031  | -0.4 | C <sub>32</sub> H <sub>38</sub> O <sub>17</sub> | 694.2109  | c |
| 38 | 6.24  | Campesterol                             | 423.3716 | 6.1  | —         | —    | C <sub>28</sub> H <sub>48</sub> O               | 400.3705  | a |
| 39 | 6.24  | 20-Glucosylginsenoside Rf               | —        | —    | 961.5372  | -0.5 | C <sub>48</sub> H <sub>82</sub> O <sub>19</sub> | 962.5450  | a |
| 40 | 6.31  | 2-Hydroxybenzoic acid                   | —        | —    | 137.0239  | -4.4 | C <sub>7</sub> H <sub>6</sub> O <sub>3</sub>    | 138.0317  | c |
| 41 | 6.50  | Tenuifoliside A                         | —        | —    | 681.2031  | 1.2  | C <sub>33</sub> H <sub>40</sub> O <sub>17</sub> | 708.2266  | c |
| 42 | 6.70  | Polygalaxanthone IV                     | 597.1820 | 2.3  | 595.1663  | 2.5  | C <sub>27</sub> H <sub>32</sub> O <sub>15</sub> | 596.1741  | c |
| 43 | 6.85  | Asarylaldehyde                          | 197.0814 | 1.7  | —         | —    | C <sub>10</sub> H <sub>12</sub> O <sub>4</sub>  | 196.0736  | d |
| 44 | 6.98  | Ginsenoside Rh4                         | 621.3287 | -0.6 | —         | —    | C <sub>36</sub> H <sub>60</sub> O <sub>8</sub>  | 620.4288  | a |
| 45 | 7.25  | Tenuifoliside C                         | —        | —    | 767.2399  | 3    | C <sub>35</sub> H <sub>44</sub> O <sub>19</sub> | 768.2477  | c |
| 46 | 7.77  | 1,6-Dihydroxy-3,7-dimethoxyxanthone     | 289.0712 | 0.0  | —         | —    | C <sub>15</sub> H <sub>12</sub> O <sub>6</sub>  | 288.0634  | c |
| 47 | 7.78  | Dibutyl oxalate                         | —        | —    | 201.1129  | -1   | C <sub>10</sub> H <sub>18</sub> O <sub>4</sub>  | 202.1205  | a |
| 48 | 7.84  | 3,4,5-Trimethoxy cinnamic acid          | —        | —    | 237.0763  | 7.2  | C <sub>12</sub> H <sub>14</sub> O <sub>5</sub>  | 238.0841  | c |
| 49 | 9.83  | Ginsenoside Rf                          | —        | —    | 799.4906  | 4.4  | C <sub>42</sub> H <sub>72</sub> O <sub>14</sub> | 800.4922  | a |
| 50 | 9.97  | 1,6,7-Trihydroxy-2,3-dimethoxyxanthonec | 305.0661 | -3.6 | 303.0505  | -0.3 | C <sub>15</sub> H <sub>12</sub> O <sub>7</sub>  | 304.0583  | c |
| 51 | 10.12 | Notoginsenoside R2                      | —        | —    | 769.4738  | 2.9  | C <sub>41</sub> H <sub>70</sub> O <sub>13</sub> | 770.4816  | a |
| 52 | 10.30 | 1-Hydroxy-3,6,7-trimethoxy xanthone     | 303.0869 | -5.9 | —         | —    | C <sub>16</sub> H <sub>14</sub> O <sub>6</sub>  | 302.0790  | c |
| 53 | 10.64 | Tenuifolin                              | —        | —    | 679.3694  | 5.2  | C <sub>36</sub> H <sub>56</sub> O <sub>12</sub> | 680.3772  | c |
| 54 | 10.77 | Ginsenoside Rg4/Rg5/Rg6/Rk              | 767.4946 | 5.0  | —         | —    | C <sub>42</sub> H <sub>70</sub> O <sub>12</sub> | 766.4867  | a |
| 55 | 10.79 | Ginsenoside Rh3                         | 605.4430 | -0.5 | —         | —    | C <sub>36</sub> H <sub>60</sub> O <sub>7</sub>  | 604.4339  | a |
| 56 | 10.80 | Ginsenoside Rb1                         | —        | —    | 1107.5961 | 4.4  | C <sub>54</sub> H <sub>92</sub> O <sub>23</sub> | 1108.6029 | a |
| 57 | 11.22 | Ginsenoside Rg4/Rg5/Rg6/Rk              | 767.4946 | 3.9  | —         | —    | C <sub>42</sub> H <sub>70</sub> O <sub>12</sub> | 766.4867  | a |
| 58 | 11.31 | Ginsenoside Rb3/Rc                      | —        | —    | 1077.5846 | 0.5  | C <sub>53</sub> H <sub>90</sub> O <sub>22</sub> | 1078.5924 | a |
| 59 | 11.36 | Ginsenoside Ro                          | —        | —    | 955.4903  | -3.3 | C <sub>48</sub> H <sub>76</sub> O <sub>19</sub> | 956.4981  | a |
| 60 | 11.57 | Ginsenoside Rg4/Rg5/Rg6/Rk              | 767.4946 | 4.0  | —         | —    | C <sub>42</sub> H <sub>70</sub> O <sub>12</sub> | 766.4867  | a |

|    |       |                                                                       |          |      |           |      |                                                  |           |   |
|----|-------|-----------------------------------------------------------------------|----------|------|-----------|------|--------------------------------------------------|-----------|---|
| 61 | 11.61 | Ginsenoside Rb3/Rc                                                    | —        | —    | 1077.5934 | 3.9  | C <sub>53</sub> H <sub>90</sub> O <sub>22</sub>  | 1078.5924 | a |
| 62 | 11.95 | Araloside A                                                           | —        | —    | 925.4797  | -1.1 | C <sub>47</sub> H <sub>74</sub> O <sub>18</sub>  | 926.4875  | a |
| 63 | 12.40 | Ginsenoside Rg4/Rg5/Rg6/Rk                                            | 767.4946 | 3.9  | —         | —    | C <sub>42</sub> H <sub>70</sub> O <sub>12</sub>  | 766.4867  | a |
| 64 | 12.76 | Notoginsenoside R1                                                    | —        | —    | 931.5266  | 0.4  | C <sub>47</sub> H <sub>80</sub> O <sub>18</sub>  | 932.5345  | a |
| 65 | 12.78 | Senegin VI                                                            | —        | —    | 1703.7480 | 0.8  | C <sub>80</sub> H <sub>120</sub> O <sub>39</sub> | 1704.7407 | c |
| 66 | 12.93 | Onjisaponin L                                                         | —        | —    | 1847.7854 | -1.2 | C <sub>86</sub> H <sub>128</sub> O <sub>43</sub> | 1848.7869 | c |
| 67 | 13.06 | Onjisaponin O                                                         | —        | —    | 1631.7233 | -1.3 | C <sub>77</sub> H <sub>116</sub> O <sub>37</sub> | 1632.7258 | c |
| 68 | 13.35 | Senegin III                                                           | —        | —    | 1571.7075 | 3.1  | C <sub>75</sub> H <sub>112</sub> O <sub>35</sub> | 1572.6984 | c |
| 69 | 13.76 | Acoronene                                                             | 235.1698 | 1.1  | —         | —    | C <sub>15</sub> H <sub>22</sub> O <sub>2</sub>   | 234.1620  | d |
| 70 | 13.89 | Onjisaponin F                                                         | —        | —    | 1587.7028 | 2.4  | C <sub>75</sub> H <sub>112</sub> O <sub>36</sub> | 1588.7041 | c |
| 71 | 14.14 | 1,6-Dihydroxy-3,5 , 7-trimethoxyxanthone                              | 319.0818 | 1.0  | 317.0661  | -5.7 | C <sub>16</sub> H <sub>14</sub> O <sub>7</sub>   | 318.0740  | c |
| 72 | 14.24 | Eudesmin                                                              | 387.1808 | 0.3  | —         | —    | C <sub>22</sub> H <sub>26</sub> O <sub>6</sub>   | 386.1729  | d |
| 73 | 14.43 | $\alpha/\gamma$ -Asarone                                              | 209.1160 | 3.8  | —         | —    | C <sub>12</sub> H <sub>16</sub> O <sub>3</sub>   | 208.1099  | d |
| 74 | 14.49 | p-Hydroxy methyl cinnamate                                            | 179.0708 | -2.8 | —         | —    | C <sub>10</sub> H <sub>10</sub> O <sub>3</sub>   | 178.0630  | c |
| 75 | 14.97 | Poricoic acid H                                                       | —        | —    | 499.3424  | -0.8 | C <sub>31</sub> H <sub>48</sub> O <sub>5</sub>   | 500.3502  | b |
| 76 | 14.97 | $\alpha/\gamma$ -Asarone                                              | 209.1178 | 2.4  | —         | —    | C <sub>12</sub> H <sub>16</sub> O <sub>3</sub>   | 208.1099  | d |
| 77 | 15.04 | Ginsenoside Roa                                                       | —        | —    | 793.4379  | 4.9  | C <sub>54</sub> O <sub>86</sub> O <sub>24</sub>  | 1117.4381 | a |
| 78 | 15.76 | Poricoic acid G                                                       | 487.3424 | -7.0 | 485.3267  | -3.5 | C <sub>30</sub> H <sub>46</sub> O <sub>5</sub>   | 486.3345  | b |
| 79 | 16.38 | Poricoic acid A                                                       | —        | —    | 497.3267  | 0    | C <sub>31</sub> H <sub>46</sub> O <sub>5</sub>   | 498.3345  | b |
| 80 | 17.23 | Ginsenoside Rd                                                        | —        | —    | 945.5423  | -1.4 | C <sub>48</sub> H <sub>82</sub> O <sub>18</sub>  | 946.5501  | a |
| 81 | 17.28 | $\alpha$ -Santalol                                                    | 221.1905 | -9.5 | —         | —    | C <sub>15</sub> H <sub>24</sub> O                | 220.1827  | a |
| 82 | 17.33 | Deoxygomisin A                                                        | 401.1964 | -7.7 | —         | —    | C <sub>23</sub> H <sub>28</sub> O <sub>6</sub>   | 400.1886  | a |
| 83 | 17.40 | 25-Hydroxyporicoic acid C                                             | —        | —    | 497.3267  | 9.2  | C <sub>31</sub> H <sub>46</sub> O <sub>5</sub>   | 498.3345  | b |
| 84 | 17.47 | Propyl benzoate                                                       | 165.0916 | 9.7  | —         | —    | C <sub>10</sub> H <sub>12</sub> O <sub>2</sub>   | 164.0837  | c |
| 85 | 17.52 | Veraguensin                                                           | 373.2015 | 7.5  | —         | —    | C <sub>22</sub> H <sub>28</sub> O <sub>5</sub>   | 372.1937  | d |
| 86 | 17.55 | 2-Methoxy-4-vinylphenol                                               | 151.0759 | 2.5  | —         | —    | C <sub>9</sub> H <sub>10</sub> O <sub>2</sub>    | 150.0681  | c |
| 87 | 17.59 | Gomisin A                                                             | 417.1875 | 1.2  | —         | —    | C <sub>23</sub> H <sub>28</sub> O <sub>7</sub>   | 416.1835  | a |
| 88 | 17.62 | 3 $\beta$ ,16 $\alpha$ -Dihydroxylanosta-7,9(11),24-trien-21-oic acid | 471.3474 | -5.9 | 469.3318  | 2.6  | C <sub>30</sub> H <sub>46</sub> O <sub>4</sub>   | 470.3396  | b |
| 89 | 17.66 | Poricoic acid B                                                       | —        | —    | 483.3111  | -1.9 | C <sub>30</sub> H <sub>44</sub> O <sub>5</sub>   | 484.3189  | b |
| 90 | 17.66 | Fal-laxsaponin A                                                      | —        | —    | 649.3795  | -7.7 | C <sub>35</sub> H <sub>54</sub> O <sub>11</sub>  | 650.3670  | c |
| 91 | 17.90 | 6,7-Dehydroporicoic acid H                                            | —        | —    | 497.3267  | -2.6 | C <sub>31</sub> H <sub>46</sub> O <sub>5</sub>   | 498.3345  | b |
| 92 | 17.97 | 16-Deoxyporicoic acid B                                               | 469.3318 | 0.4  | 467.3161  | 4.7  | C <sub>30</sub> H <sub>44</sub> O <sub>4</sub>   | 468.3240  | b |

|     |       |                                                              |          |      |          |      |                                                |          |   |
|-----|-------|--------------------------------------------------------------|----------|------|----------|------|------------------------------------------------|----------|---|
| 93  | 18.00 | cis/trans-Methylisoeugenol                                   | 179.1072 | 6.7  | —        | —    | C <sub>11</sub> H <sub>14</sub> O <sub>2</sub> | 178.0994 | d |
| 94  | 18.04 | Tumulolic acid                                               | —        | —    | 485.3631 | 2.3  | C <sub>31</sub> H <sub>50</sub> O <sub>4</sub> | 486.3709 | b |
| 95  | 18.04 | Bisasaricin                                                  | 417.2277 | 1.0  | —        | —    | C <sub>24</sub> H <sub>32</sub> O <sub>6</sub> | 416.2199 | d |
| 96  | 18.05 | δ-Cadinene/β-Caryophyllene/Isocaryophyllen                   | 205.1927 | -1.1 | —        | —    | C <sub>15</sub> H <sub>24</sub>                | 204.1878 | d |
| 97  | 18.09 | cis/trans-Methylisoeugenol                                   | 179.0726 | 6.7  | —        | —    | C <sub>11</sub> H <sub>14</sub> O <sub>2</sub> | 178.0994 | d |
| 98  | 18.16 | 25-methoxyporicoic acid                                      | —        | —    | 527.3373 | 2.5  | C <sub>32</sub> H <sub>48</sub> O <sub>6</sub> | 528.3451 | b |
| 99  | 18.17 | δ-Cadinene/β-Caryophyllene/Isocaryophyllen                   | 205.1930 | -2.7 | —        | —    | C <sub>15</sub> H <sub>24</sub>                | 204.1878 | d |
| 100 | 18.19 | 3β-Hydroxy-16α-acetoxy-lanosta-7,9 (11),24-trien-21-oic acid | 513.3580 | -1.9 | —        | —    | C <sub>32</sub> H <sub>48</sub> O <sub>5</sub> | 512.3502 | b |
| 101 | 18.31 | Daedaleanic acid A                                           | 483.3474 | -2.1 | 481.3318 | -3.7 | C <sub>31</sub> H <sub>46</sub> O <sub>4</sub> | 482.3396 | b |
| 102 | 18.49 | Dehydroeburiconic acid                                       | 467.3525 | 0.2  | —        | —    | C <sub>31</sub> H <sub>46</sub> O <sub>3</sub> | 466.3447 | b |
| 103 | 18.50 | Dehydrotu-mulosic acid                                       | —        | —    | 483.3474 | -2.3 | C <sub>31</sub> H <sub>48</sub> O <sub>4</sub> | 484.3553 | b |
| 104 | 18.51 | δ-Cadinene/β-Caryophyllene/Isocaryophyllen                   | 205.1952 | -5.8 | —        | —    | C <sub>15</sub> H <sub>24</sub>                | 204.1878 | d |
| 105 | 18.71 | 2,6-Di-sec-butyl-4-methylphenol                              | 221.1905 | -7.2 | —        | —    | C <sub>15</sub> H <sub>24</sub> O              | 220.1827 | a |
| 106 | 19.07 | Poricoic acid AE                                             | —        | —    | 525.3580 | 0.6  | C <sub>33</sub> H <sub>50</sub> O <sub>5</sub> | 526.3658 | b |
| 107 | 19.99 | Pachymic acid                                                | —        | —    | 527.3737 | -0.8 | C <sub>33</sub> H <sub>52</sub> O <sub>5</sub> | 528.3815 | b |

Note: a: Ginseng Radix; b: Poria; c: Polygalae Radix; d, Acori Tatarinowii Rhizoma

**Supplementary table 2. MS and MS/MS data of the identified components from KXS in both positive and negative ion mode.**

| No. | Rt/<br>min | Compound Name                                     | Formula                                                        | MS/MS data<br>ESI <sup>-</sup> or ESI <sup>+</sup>                                                                                                                                                                                                                        |
|-----|------------|---------------------------------------------------|----------------------------------------------------------------|---------------------------------------------------------------------------------------------------------------------------------------------------------------------------------------------------------------------------------------------------------------------------|
| 1   | 0.83       | Asparagine                                        | C <sub>4</sub> H <sub>7</sub> NO <sub>4</sub>                  | 131[M-H] <sup>-</sup> , 114[M-H-OH] <sup>-</sup> , 113[M-H-H <sub>2</sub> O] <sup>-</sup>                                                                                                                                                                                 |
| 2   | 0.83       | Bergapten                                         | C <sub>12</sub> H <sub>8</sub> O <sub>4</sub>                  | 215[M-H] <sup>-</sup> , 179[M-H-3C] <sup>-</sup> ,<br>161[M-H-C <sub>3</sub> H <sub>2</sub> O] <sup>-</sup> , 89[M-H-C <sub>7</sub> H <sub>10</sub> O <sub>2</sub> ] <sup>-</sup><br>499[M+H] <sup>+</sup> , 481[M+H-NH <sub>4</sub> ] <sup>+</sup> ,                     |
| 3   | 0.85       | Argininy-fructosyl-glucose                        | C <sub>18</sub> H <sub>34</sub> N <sub>4</sub> O <sub>12</sub> | 251[M+H-(Glc-H <sub>2</sub> O)-C <sub>3</sub> H <sub>8</sub> N <sub>3</sub> ] <sup>+</sup> , 175[M+H-<br>2(Glc-H <sub>2</sub> O)] <sup>+</sup>                                                                                                                            |
| 4   | 0.86       | Isopimpinellin                                    | C <sub>13</sub> H <sub>10</sub> O <sub>5</sub>                 | 245[M-H] <sup>-</sup> , 173[M-H-C <sub>3</sub> H <sub>4</sub> O <sub>2</sub> ] <sup>-</sup> , 131[M-H-<br>C <sub>5</sub> H <sub>6</sub> O <sub>3</sub> ] <sup>-</sup>                                                                                                     |
| 5   | 0.90       | Mannose                                           | C <sub>6</sub> H <sub>12</sub> O <sub>6</sub>                  | 179[M-H] <sup>-</sup> , 161[M-H-H <sub>4</sub> O] <sup>-</sup> , 96[M-H-CH <sub>8</sub> O <sub>4</sub> ] <sup>-</sup>                                                                                                                                                     |
| 6   | 0.93       | Valine                                            | C <sub>5</sub> H <sub>11</sub> NO <sub>2</sub>                 | 103[M+H-NH] <sup>+</sup> , 100[M+H-H <sub>2</sub> O] <sup>+</sup>                                                                                                                                                                                                         |
| 7   | 0.93       | 5-Hydroxymethylfurfural                           | C <sub>6</sub> H <sub>6</sub> O <sub>3</sub>                   | 127[M+H] <sup>+</sup> , 109[M+H-H <sub>2</sub> O] <sup>+</sup><br>148[M+H-CH <sub>3</sub> ] <sup>+</sup> , 119[M+H-C <sub>2</sub> H <sub>4</sub> O] <sup>+</sup> ,                                                                                                        |
| 8   | 0.93       | Dimethyl(R)-(+)-malate                            | C <sub>6</sub> H <sub>10</sub> O <sub>5</sub>                  | 161[M-H] <sup>-</sup> , 142[M-H-H <sub>2</sub> O] <sup>-</sup> ,<br>99[M-H-2CH <sub>2</sub> OH] <sup>-</sup> , 57[M-H-2CH <sub>2</sub> OH-CO-CH <sub>2</sub> ] <sup>-</sup>                                                                                               |
| 9   | 0.97       | 2,3-Dihydro-3,5-dihydroxy-6-methyl-4H-pyran-4-one | C <sub>6</sub> H <sub>8</sub> O <sub>4</sub>                   | 145[M+H] <sup>+</sup> , 128[M+H-HO] <sup>+</sup> , 111[M+H-H <sub>2</sub> O <sub>2</sub> ] <sup>+</sup><br>341[M-H] <sup>-</sup> , 179[M-H-(Glc-H <sub>2</sub> O)] <sup>-</sup> ,                                                                                         |
| 10  | 1.12       | Sucrose                                           | C <sub>12</sub> H <sub>22</sub> O <sub>11</sub>                | 161[M-H-Glc] <sup>-</sup> , 119[M-H-(Glc-H <sub>2</sub> O)-CO <sub>3</sub> ] <sup>-</sup> ,<br>113[M-H-Glc-CH <sub>4</sub> O <sub>2</sub> ] <sup>-</sup><br>124[M+H] <sup>+</sup> , 108[M+H-O] <sup>+</sup> ,                                                             |
| 11  | 1.53       | Nicotinic acid                                    | C <sub>6</sub> H <sub>5</sub> NO <sub>2</sub>                  | 106[M+H-H <sub>2</sub> O] <sup>+</sup> , 80[M+H-C <sub>2</sub> H <sub>6</sub> N] <sup>+</sup>                                                                                                                                                                             |
| 12  | 1.62       | Benzoic acid                                      | C <sub>7</sub> H <sub>6</sub> O <sub>2</sub>                   | 123[M+H] <sup>+</sup> , 108[M+H-O] <sup>+</sup>                                                                                                                                                                                                                           |
| 13  | 1.62       | Adenine                                           | C <sub>5</sub> H <sub>5</sub> N <sub>5</sub>                   | 136[M+H] <sup>+</sup> , 119[M+H-H <sub>3</sub> N] <sup>+</sup> , 109[M+H-CHN] <sup>+</sup><br>243[M-H] <sup>-</sup> , 230[M-H-N] <sup>-</sup> , 216[M-H-C <sub>2</sub> H <sub>2</sub> ] <sup>-</sup> ,                                                                    |
| 14  | 1.62       | L-Uridine                                         | C <sub>9</sub> H <sub>12</sub> N <sub>2</sub> O <sub>6</sub>   | 183[M-H-CO <sub>3</sub> ] <sup>-</sup> , 110[M-H-C <sub>5</sub> H <sub>9</sub> O <sub>4</sub> ] <sup>-</sup>                                                                                                                                                              |
| 15  | 1.62       | Adenosine                                         | C <sub>10</sub> H <sub>13</sub> N <sub>5</sub> O <sub>4</sub>  | 268[M+H] <sup>+</sup> , 136[M+H-C <sub>4</sub> H <sub>10</sub> N <sub>3</sub> O <sub>2</sub> ] <sup>+</sup> , 119[M+H-<br>C <sub>5</sub> H <sub>13</sub> N <sub>2</sub> O <sub>3</sub> ] <sup>+</sup><br>137[M+H] <sup>+</sup> , 119[M+H-CH <sub>6</sub> ] <sup>+</sup> , |
| 16  | 1.66       | Phenyl acetate                                    | C <sub>8</sub> H <sub>8</sub> O <sub>2</sub>                   | 107[M+H-CH <sub>2</sub> O] <sup>+</sup> , 91[M+H-C <sub>2</sub> H <sub>6</sub> O] <sup>+</sup>                                                                                                                                                                            |
| 17  | 2.04       | Sibiricose A3                                     | C <sub>19</sub> H <sub>26</sub> O <sub>13</sub>                | 461[M-H] <sup>-</sup> , 281[M-H-Fru] <sup>-</sup> ,                                                                                                                                                                                                                       |

|    |      |                      |                                                               |                                                                                                                                                                                                                                                                                                                                                                                                                                                                                                                                                                                                                         |
|----|------|----------------------|---------------------------------------------------------------|-------------------------------------------------------------------------------------------------------------------------------------------------------------------------------------------------------------------------------------------------------------------------------------------------------------------------------------------------------------------------------------------------------------------------------------------------------------------------------------------------------------------------------------------------------------------------------------------------------------------------|
|    |      |                      |                                                               | 239[M-H-Fru-C <sub>2</sub> H <sub>2</sub> O] <sup>-</sup> ,152[M-H-Fru-C <sub>5</sub> H <sub>5</sub> O <sub>4</sub> ] <sup>-</sup> ,<br>137[M-H-Fru- ( Fru-2H <sub>2</sub> O ) ] <sup>-</sup> ,<br>257[M-H] <sup>-</sup> ,199[M-H-C <sub>3</sub> H <sub>6</sub> O] <sup>-</sup> ,<br>194[M-H-C <sub>4</sub> O] <sup>-</sup> ,166[M-H-C <sub>6</sub> H <sub>3</sub> O] <sup>-</sup><br>287[M+H] <sup>+</sup> ,241[M+H-C <sub>2</sub> H <sub>6</sub> O] <sup>+</sup> ,                                                                                                                                                    |
| 18 | 2.04 | Gentisin             | C <sub>14</sub> H <sub>10</sub> O <sub>5</sub>                |                                                                                                                                                                                                                                                                                                                                                                                                                                                                                                                                                                                                                         |
| 19 | 2.09 | Kaempferol           | C <sub>15</sub> H <sub>10</sub> O <sub>6</sub>                | 208[M+H-C <sub>4</sub> O <sub>2</sub> ] <sup>+</sup> ,193[M+H-C <sub>6</sub> H <sub>5</sub> -OH] <sup>+</sup> ,<br>285[M-H] <sup>-</sup> ,223[M-H-C <sub>2</sub> H <sub>6</sub> O <sub>2</sub> ] <sup>-</sup> ,<br>154[M-H-C <sub>8</sub> H <sub>3</sub> O <sub>2</sub> ] <sup>-</sup> ,143[M-H-C <sub>6</sub> H <sub>6</sub> O <sub>4</sub> ] <sup>-</sup><br>503[M-H] <sup>-</sup> ,323[M-H-Glc] <sup>-</sup> ,<br>179[M-H-(Glc-H <sub>2</sub> O)-(Fru-H <sub>2</sub> O)] <sup>-</sup> ,<br>547[M-H] <sup>-</sup> ,367[M-H-Glc] <sup>-</sup> ,341[M-H-C <sub>11</sub> H <sub>10</sub> O <sub>4</sub> ] <sup>-</sup> , |
| 20 | 2.19 | Raffinose            | C <sub>18</sub> H <sub>32</sub> O <sub>16</sub>               |                                                                                                                                                                                                                                                                                                                                                                                                                                                                                                                                                                                                                         |
| 21 | 2.24 | Sibiricose A6        | C <sub>23</sub> H <sub>32</sub> O <sub>15</sub>               | 223[M-H-Glc-(Fru-2H <sub>2</sub> O)] <sup>-</sup> ,<br>205[M-H-Glc-(Fru-H <sub>2</sub> O)] <sup>-</sup><br>517[M-H] <sup>-</sup> ,341[M-H-C <sub>10</sub> H <sub>8</sub> O <sub>3</sub> ] <sup>-</sup> ,337[M-H-Glc] <sup>-</sup> ,                                                                                                                                                                                                                                                                                                                                                                                     |
| 22 | 2.26 | Sibiricose A5        | C <sub>22</sub> H <sub>30</sub> O <sub>14</sub>               | 193[M-H-Glc-(Fru-2H <sub>2</sub> O)] <sup>-</sup> ,<br>175[M-H-Glc-(Fru-H <sub>2</sub> O)] <sup>-</sup><br>547[M-H] <sup>-</sup> ,385[M-H-(Fru-H <sub>2</sub> O)] <sup>-</sup> ,367[M-H-Fru] <sup>-</sup> ,<br>,                                                                                                                                                                                                                                                                                                                                                                                                        |
| 23 | 2.41 | Sibiricose A1        | C <sub>23</sub> H <sub>32</sub> O <sub>16</sub>               | 325[M-H-C <sub>11</sub> H <sub>10</sub> O <sub>5</sub> ] <sup>-</sup> ,223[M-H-Fru-(Glc-2H <sub>2</sub> O)] <sup>-</sup><br>,<br>205[M-H-Fru-(Glc-H <sub>2</sub> O)] <sup>-</sup><br>377[M+H] <sup>+</sup> ,359[M+H-H <sub>2</sub> O] <sup>+</sup> ,                                                                                                                                                                                                                                                                                                                                                                    |
| 24 | 2.46 | Vitamin B2           | C <sub>17</sub> H <sub>20</sub> N <sub>4</sub> O <sub>6</sub> | 243[M+H-C <sub>5</sub> H <sub>10</sub> O <sub>4</sub> ] <sup>+</sup> ,172[M+H-C <sub>7</sub> H <sub>11</sub> NO <sub>6</sub> ] <sup>+</sup><br>325[M+H] <sup>+</sup> ,307[M+H-H <sub>2</sub> O] <sup>+</sup> ,                                                                                                                                                                                                                                                                                                                                                                                                          |
| 25 | 2.54 | Tatarine C           | C <sub>15</sub> H <sub>20</sub> N <sub>2</sub> O <sub>6</sub> | 191[M+H-CH <sub>2</sub> -4CH <sub>2</sub> O] <sup>+</sup> ,175[M+H-CH <sub>2</sub> -<br>4CH <sub>2</sub> O-O] <sup>+</sup>                                                                                                                                                                                                                                                                                                                                                                                                                                                                                              |
| 26 | 2.63 | Salicylic acid       | C <sub>7</sub> H <sub>6</sub> O <sub>3</sub>                  | 137[M-H] <sup>-</sup> ,108[M-H-2O] <sup>-</sup><br>407[M+H] <sup>+</sup> ,389[M+H-H <sub>2</sub> O] <sup>+</sup> ,287[M+H-<br>C <sub>7</sub> H <sub>4</sub> O <sub>2</sub> ] <sup>+</sup> ,                                                                                                                                                                                                                                                                                                                                                                                                                             |
| 27 | 2.73 | Lancerin             | C <sub>19</sub> H <sub>18</sub> O <sub>10</sub>               | 405[M-H] <sup>-</sup> ,315[M-H-C <sub>6</sub> H <sub>2</sub> O] <sup>-</sup> ,285[M-H-<br>C <sub>7</sub> H <sub>4</sub> O <sub>2</sub> ] <sup>-</sup> ,<br>257[M-H-C <sub>7</sub> O <sub>4</sub> ] <sup>-</sup> ,213[M-H-C <sub>10</sub> H <sub>8</sub> O <sub>4</sub> ] <sup>-</sup>                                                                                                                                                                                                                                                                                                                                   |
| 28 | 2.95 | Polygalaxanthone III | C <sub>25</sub> H <sub>28</sub> O <sub>15</sub>               | 569[M+H] <sup>+</sup> ,551[M+H-H <sub>2</sub> O] <sup>+</sup> ,317[M+H-Api-<br>C <sub>4</sub> H <sub>6</sub> O <sub>3</sub> ] <sup>+</sup> ,                                                                                                                                                                                                                                                                                                                                                                                                                                                                            |

|    |      |                                    |                                                 |                                                                                                                                                                                                                                                                                                                                                                                                                                                                                                                                                                                                                                       |
|----|------|------------------------------------|-------------------------------------------------|---------------------------------------------------------------------------------------------------------------------------------------------------------------------------------------------------------------------------------------------------------------------------------------------------------------------------------------------------------------------------------------------------------------------------------------------------------------------------------------------------------------------------------------------------------------------------------------------------------------------------------------|
|    |      |                                    |                                                 | 287[M+H-(Api-H <sub>2</sub> O)-C <sub>6</sub> H <sub>14</sub> O <sub>4</sub> ] <sup>+</sup> ,<br>567[M-H] <sup>-</sup> ,447[M-H-C <sub>7</sub> H <sub>4</sub> O <sub>2</sub> ] <sup>-</sup> ,417[M-H-Api] <sup>-</sup> ,<br>345[M-H-Api-C <sub>3</sub> H <sub>4</sub> O <sub>2</sub> ] <sup>-</sup> ,315[M-H-Api-C <sub>4</sub> H <sub>6</sub> O <sub>3</sub> ] <sup>-</sup> ,<br>272[M-H-(Api-H <sub>2</sub> O)-C <sub>8</sub> H <sub>3</sub> O <sub>4</sub> ] <sup>-</sup> ,259[M-H-Api-C <sub>6</sub> H <sub>6</sub> O <sub>5</sub> ] <sup>-</sup> ,<br>561[M-H] <sup>-</sup> ,237[M-H-Fru-(Glc-2H <sub>2</sub> O)] <sup>-</sup> , |
| 29 | 3.17 | Sibiricose A2                      | C <sub>24</sub> H <sub>34</sub> O <sub>15</sub> | 209[M-H-Fru-Glc-CH <sub>2</sub> +H <sub>6</sub> O] <sup>-</sup> ,<br>179[M-H-(Glc-H <sub>2</sub> O)-C <sub>12</sub> H <sub>12</sub> O <sub>4</sub> ] <sup>-</sup>                                                                                                                                                                                                                                                                                                                                                                                                                                                                     |
| 30 | 3.21 | N-Acetyl-D-glucosamine             | C <sub>8</sub> H <sub>15</sub> NO <sub>6</sub>  | 222[M+H] <sup>+</sup> ,207[M+H-CH <sub>3</sub> ] <sup>+</sup> ,147[M+H-C <sub>2</sub> H <sub>5</sub> NO <sub>2</sub> ] <sup>+</sup>                                                                                                                                                                                                                                                                                                                                                                                                                                                                                                   |
| 31 | 3.62 | 1-(3,4-Dimethoxyphenyl)ethan-1-one | C <sub>10</sub> H <sub>12</sub> O <sub>3</sub>  | 181[M+H] <sup>+</sup> ,166[M+H-CH <sub>3</sub> ] <sup>+</sup> ,<br>151[M+H-2CH <sub>3</sub> ] <sup>+</sup> ,121[M+H-CH <sub>3</sub> -C <sub>2</sub> H <sub>5</sub> O] <sup>+</sup>                                                                                                                                                                                                                                                                                                                                                                                                                                                    |
| 32 | 4.51 | 2,4,5-Trimethoxybenzoic acid       | C <sub>10</sub> H <sub>12</sub> O <sub>5</sub>  | 213[M+H] <sup>+</sup> ,198[M+H-CH <sub>3</sub> ] <sup>+</sup> ,154[M+H-C <sub>3</sub> H <sub>7</sub> O] <sup>+</sup><br>583[M+H] <sup>+</sup> ,437[M+H-(Rha-H <sub>2</sub> O)] <sup>+</sup> ,<br>405[M+H-Rha-O] <sup>+</sup> ,275[M+H-Rha-(Glc-2H <sub>2</sub> O)] <sup>+</sup> ,                                                                                                                                                                                                                                                                                                                                                     |
| 33 | 4.64 | Polygalaxanthone V                 | C <sub>26</sub> H <sub>30</sub> O <sub>15</sub> | 581[M-H] <sup>-</sup> ,417[M-H-Rha] <sup>-</sup> ,388[M-H-Rha-CHO] <sup>-</sup> ,<br>273[M-H-Rha-(Glc-2H <sub>2</sub> O)] <sup>-</sup> ,<br>258[M-H-Rha-(Glc-2H <sub>2</sub> O)-CH <sub>3</sub> ] <sup>-</sup> ,<br>230[M-H-C <sub>14</sub> H <sub>9</sub> O <sub>6</sub> -C <sub>3</sub> H <sub>9</sub> O-OH] <sup>-</sup><br>613[M+H] <sup>+</sup> ,467[M+H-(Rha-H <sub>2</sub> O)] <sup>+</sup> ,<br>305[M+H-Rha-(Glc-2H <sub>2</sub> O)] <sup>+</sup> ,<br>290[M+H-Rha-(Glc-2H <sub>2</sub> O)-CH <sub>3</sub> ] <sup>+</sup> ,                                                                                                   |
| 34 | 4.88 | Polygalaxanthone VII               | C <sub>27</sub> H <sub>32</sub> O <sub>16</sub> | 611[M-H] <sup>-</sup> ,596[M-H-CH <sub>3</sub> ] <sup>-</sup> ,<br>303[M-H-Rha-(Glc-2H <sub>2</sub> O)] <sup>-</sup> ,<br>287[M-H-Rha-(Glc-2H <sub>2</sub> O)-CH <sub>4</sub> ] <sup>-</sup> ,259[M-H-C <sub>16</sub> H <sub>16</sub> O <sub>9</sub> ] <sup>-</sup><br>209[M+H] <sup>+</sup> ,193[M+H-CH <sub>4</sub> ] <sup>+</sup> ,<br>148[M+H-C <sub>2</sub> H <sub>5</sub> O <sub>2</sub> ] <sup>+</sup> ,120[M+H-C <sub>4</sub> H <sub>9</sub> O <sub>2</sub> ] <sup>+</sup>                                                                                                                                                    |
| 35 | 5.14 | 3,4-Dimethoxycinnamic acid         | C <sub>11</sub> H <sub>12</sub> O <sub>4</sub>  | 191[M+H] <sup>+</sup> ,163[M+H-2CH <sub>2</sub> ] <sup>+</sup> ,148[M+H-C <sub>3</sub> H <sub>7</sub> ] <sup>+</sup> ,<br>133[M+H-C <sub>3</sub> H <sub>6</sub> O] <sup>+</sup> ,105[M+H-C <sub>4</sub> H <sub>6</sub> O <sub>2</sub> ] <sup>+</sup>                                                                                                                                                                                                                                                                                                                                                                                  |
| 36 | 5.57 | 2,5-Dimethyl-7-hydroxy chromone    | C <sub>11</sub> H <sub>10</sub> O <sub>3</sub>  | 693[M-H] <sup>-</sup> ,668[M-H-C <sub>2</sub> H] <sup>-</sup> ,<br>517[M-H-C <sub>10</sub> H <sub>8</sub> O <sub>3</sub> ] <sup>-</sup> ,499[M-H-C <sub>10</sub> H <sub>8</sub> O <sub>3</sub> -H <sub>2</sub> O] <sup>-</sup>                                                                                                                                                                                                                                                                                                                                                                                                        |
| 37 | 5.81 | Tenuifoliside B                    | C <sub>32</sub> H <sub>38</sub> O <sub>17</sub> |                                                                                                                                                                                                                                                                                                                                                                                                                                                                                                                                                                                                                                       |

|    |      |                                        |                      |                                                                                                                                                                                                                                                                                                                                 |
|----|------|----------------------------------------|----------------------|---------------------------------------------------------------------------------------------------------------------------------------------------------------------------------------------------------------------------------------------------------------------------------------------------------------------------------|
| 38 | 6.24 | Campesterol                            | $C_{28}H_{48}O$      | 423[M+Na] <sup>+</sup> ,367[M+H-CH <sub>6</sub> O] <sup>+</sup> ,<br>349[M+H-C <sub>2</sub> H <sub>12</sub> O] <sup>+</sup> ,133[M+H-C <sub>18</sub> H <sub>36</sub> O] <sup>+</sup><br>961[M-H] <sup>-</sup> ,799[M-H-(Glc-H <sub>2</sub> O)] <sup>-</sup> ,781[M-H-Glc] <sup>-</sup>                                          |
| 39 | 6.24 | 20-Glucosylginsenoside Rf              | $C_{48}H_{82}O_{19}$ | ,<br>637[M-H-2(Glc-H <sub>2</sub> O)] <sup>-</sup> ,475[M-H-3(Glc-H <sub>2</sub> O)] <sup>-</sup>                                                                                                                                                                                                                               |
| 40 | 6.31 | 2-Hhydroxybenzoic acid                 | $C_7H_6O_3$          | 137[M-H] <sup>-</sup> ,93[M-H-CO <sub>2</sub> ] <sup>-</sup><br>681[M-H-C <sub>2</sub> H <sub>2</sub> ] <sup>-</sup> ,443[M-H-C <sub>12</sub> H <sub>10</sub> O <sub>5</sub> -CH <sub>2</sub> OH] <sup>-</sup> ,                                                                                                                |
| 41 | 6.50 | Tenuifoliside A                        | $C_{33}H_{40}O_{17}$ | 281[M-H-C <sub>12</sub> H <sub>10</sub> O <sub>5</sub> -C <sub>10</sub> H <sub>7</sub> O <sub>3</sub> -OH] <sup>-</sup> ,137[M-H-C <sub>27</sub> H <sub>38</sub> O <sub>13</sub> ] <sup>-</sup><br>597[M+H] <sup>+</sup> ,451[M+H-(Rha-H <sub>2</sub> O)] <sup>+</sup> ,<br>289[M+H-Rha-(Glc-2H <sub>2</sub> O)] <sup>+</sup> , |
| 42 | 6.70 | PolygalaxanthoneIV                     | $C_{27}H_{32}O_{15}$ | 595[M-H] <sup>-</sup> ,551[M-H-C <sub>2</sub> H <sub>4</sub> O] <sup>-</sup> ,515[M-H-C <sub>2</sub> H <sub>4</sub> O-2H <sub>2</sub> O] <sup>-</sup> ,<br>287[M-H-Rha-(Glc-2H <sub>2</sub> O)] <sup>-</sup><br>197[M+H] <sup>+</sup> ,182[M+H-CH <sub>3</sub> ] <sup>+</sup> ,                                                 |
| 43 | 6.85 | Asarylaldehyde                         | $C_{10}H_{12}O_4$    | 169[M+H-2CH <sub>2</sub> ] <sup>+</sup> ,123[M+H-3CH <sub>3</sub> -CHO] <sup>+</sup><br>621[M+H] <sup>+</sup> ,603[M+H-CH <sub>6</sub> ] <sup>+</sup> ,481[M+H-CH <sub>2</sub> OH-C <sub>8</sub> H <sub>13</sub> O] <sup>+</sup> ,                                                                                              |
| 44 | 6.98 | Ginsenoside Rh4                        | $C_{36}H_{60}O_8$    | 264[M+H-(Glc-H <sub>2</sub> O)-C <sub>20</sub> H <sub>37</sub> ] <sup>+</sup><br>767[M-H] <sup>-</sup> ,529[M-H-C <sub>12</sub> H <sub>14</sub> O <sub>5</sub> ] <sup>-</sup> ,                                                                                                                                                 |
| 45 | 7.25 | Tenuifoliside C                        | $C_{35}H_{44}O_{19}$ | 205[M-H-C <sub>12</sub> H <sub>14</sub> O <sub>5</sub> -(Glc-H <sub>2</sub> O)-(Fru-H <sub>2</sub> O)] <sup>-</sup> ,<br>145[M-H-2C <sub>12</sub> H <sub>14</sub> O <sub>5</sub> -C <sub>5</sub> H <sub>6</sub> O <sub>5</sub> ] <sup>-</sup> ,<br>289[M+H] <sup>+</sup> ,274[M+H-CH <sub>3</sub> ] <sup>+</sup> ,              |
| 46 | 7.77 | 1,6-Dihydroxy-3,7-dimethoxyxanthone    | $C_{15}H_{12}O_6$    | 243[M+H-2CH <sub>3</sub> -O] <sup>+</sup> ,<br>231[M+H-C <sub>3</sub> H <sub>6</sub> O] <sup>+</sup>                                                                                                                                                                                                                            |
| 47 | 7.78 | Dibutyl oxalate                        | $C_{10}H_{18}O_4$    | 201[M-H] <sup>-</sup> ,183[M-H-H <sub>2</sub> O] <sup>-</sup> ,139[M-H-C <sub>2</sub> H <sub>5</sub> -CH <sub>4</sub> -OH] <sup>-</sup>                                                                                                                                                                                         |
| 48 | 7.84 | 3,4,5-Trimethoxy cinnamic acid         | $C_{12}H_{14}O_5$    | 237[M-H] <sup>-</sup> ,197[M-H-C <sub>3</sub> H <sub>4</sub> ] <sup>-</sup> ,193[M-H-CO <sub>2</sub> ] <sup>-</sup><br>799[M-H] <sup>-</sup> ,637[M-H-(Glc-H <sub>2</sub> O)] <sup>-</sup> ,                                                                                                                                    |
| 49 | 9.83 | Ginsenoside Rf                         | $C_{42}H_{72}O_{14}$ | 475[M-H-2(Glc-H <sub>2</sub> O)] <sup>-</sup> ,161[M-H-Glc-C <sub>30</sub> H <sub>50</sub> O <sub>3</sub> ] <sup>-</sup><br>305[M+H] <sup>+</sup> ,290[M+H-CH <sub>3</sub> ] <sup>+</sup> ,275[M+H-2CH <sub>3</sub> ] <sup>+</sup> ,<br>247[M+H-2CHO] <sup>+</sup> ,236[M+H-C <sub>3</sub> HO <sub>2</sub> ] <sup>+</sup> ,     |
| 50 | 9.97 | 1,6,7-Trihydroxy-2,3-dimethoxyxanthone | $C_{15}H_{12}O_7$    | 303[M-H] <sup>-</sup> ,288[M-H-CH <sub>3</sub> ] <sup>-</sup> ,273[M-H-2CH <sub>3</sub> ] <sup>-</sup> ,<br>259[M-H-2CH <sub>2</sub> -O] <sup>-</sup> ,245[M-H-C <sub>2</sub> H <sub>2</sub> O <sub>2</sub> ] <sup>-</sup>                                                                                                      |



|    |       |                                     |                                                 |                                                                                                                                                                                                                                                                                        |
|----|-------|-------------------------------------|-------------------------------------------------|----------------------------------------------------------------------------------------------------------------------------------------------------------------------------------------------------------------------------------------------------------------------------------------|
|    |       |                                     |                                                 | 769[M-H] <sup>-</sup> ,637[M-H-(Xyl-H <sub>2</sub> O)] <sup>-</sup> ,                                                                                                                                                                                                                  |
| 51 | 10.12 | Notoginsenoside R2                  | C <sub>41</sub> H <sub>70</sub> O <sub>13</sub> | 475[M-H-(Xyl-H <sub>2</sub> O)-(Glc-H <sub>2</sub> O)] <sup>-</sup> ,<br>161[M-H-(Xyl-H <sub>2</sub> O)-C <sub>30</sub> H <sub>52</sub> O <sub>4</sub> ] <sup>-</sup>                                                                                                                  |
| 52 | 10.30 | 1-Hydroxy-3,6,7-trimethoxy xanthone | C <sub>16</sub> H <sub>14</sub> O <sub>6</sub>  | 303[M+H] <sup>+</sup> ,288[M+H-CH <sub>3</sub> ] <sup>+</sup> ,<br>273[M+H-2CH <sub>3</sub> ] <sup>+</sup> ,245[M+H-3CH <sub>2</sub> -O] <sup>+</sup>                                                                                                                                  |
| 53 | 10.64 | Tenuifolin                          | C <sub>36</sub> H <sub>56</sub> O <sub>12</sub> | 679[M-H] <sup>-</sup> ,455[M-H-Glc-CO <sub>2</sub> ] <sup>-</sup> ,<br>425[M-H-Glc-CO <sub>2</sub> -CHOH] <sup>-</sup> ,179[M-H-C <sub>30</sub> H <sub>44</sub> O <sub>5</sub> ] <sup>-</sup>                                                                                          |
| 54 | 10.77 | Ginsenoside Rg4/Rg5/Rg6/Rk          | C <sub>42</sub> H <sub>70</sub> O <sub>12</sub> | 767[M+H] <sup>+</sup> ,749[M+H-H <sub>2</sub> O] <sup>+</sup> ,605[M+H-(Glc-H <sub>2</sub> O)] <sup>+</sup> ,<br>587[M+H-Glc] <sup>+</sup> ,407[M+H-2Glc] <sup>+</sup>                                                                                                                 |
| 55 | 10.79 | Ginsenoside Rh3                     | C <sub>36</sub> H <sub>60</sub> O <sub>7</sub>  | 605[M+H] <sup>+</sup> ,587[M+H-H <sub>2</sub> O] <sup>+</sup> ,515[M+H-C <sub>5</sub> H <sub>12</sub> -H <sub>2</sub> O] <sup>+</sup> ,<br>425[M+H-Glc] <sup>+</sup> ,407[M+H-Glc-H <sub>2</sub> O] <sup>+</sup>                                                                       |
| 56 | 10.80 | Ginsenoside Rb1                     | C <sub>54</sub> H <sub>92</sub> O <sub>23</sub> | 1107[M-H] <sup>-</sup> ,945[M-H-(Glc-H <sub>2</sub> O)] <sup>-</sup> ,<br>783[M-H-2(Glc-H <sub>2</sub> O)] <sup>-</sup> ,459[M-H-4(Glc-H <sub>2</sub> O)] <sup>-</sup>                                                                                                                 |
| 57 | 11.22 | Ginsenoside Rg4/Rg5/Rg6/Rk          | C <sub>42</sub> H <sub>70</sub> O <sub>12</sub> | 767[M+H] <sup>+</sup> ,749[M+H-H <sub>2</sub> O] <sup>+</sup> ,605[M+H-(Glc-H <sub>2</sub> O)] <sup>+</sup> ,<br>587[M+H-Glc] <sup>+</sup> ,407[M+H-2Glc] <sup>+</sup>                                                                                                                 |
| 58 | 11.31 | Ginsenoside Rb3/Rc                  | C <sub>53</sub> H <sub>90</sub> O <sub>22</sub> | 1077[M-H] <sup>-</sup> ,956[M-H-3HO-C <sub>5</sub> H <sub>10</sub> ] <sup>-</sup> ,<br>945[M-H-(Xyl-H <sub>2</sub> O)] <sup>-</sup> ,<br>783[M-H-(Xyl-H <sub>2</sub> O)-(Glc-H <sub>2</sub> O)] <sup>-</sup> ,<br>459[M-H-(Xyl-H <sub>2</sub> O)-3(Glc-H <sub>2</sub> O)] <sup>-</sup> |
| 59 | 11.36 | Ginsenoside Ro                      | C <sub>48</sub> H <sub>76</sub> O <sub>19</sub> | 956[M-H] <sup>-</sup> ,793[M-H-(Glc-H <sub>2</sub> O)] <sup>-</sup> ,<br>731[M-H-Glc-CO <sub>2</sub> ] <sup>-</sup> ,613[M-H-Glc-(Glc-H <sub>2</sub> O)] <sup>-</sup>                                                                                                                  |
| 60 | 11.57 | Ginsenoside Rg4/Rg5/Rg6/Rk          | C <sub>42</sub> H <sub>70</sub> O <sub>12</sub> | 767[M+H] <sup>+</sup> ,749[M+H-H <sub>2</sub> O] <sup>+</sup> ,605[M+H-(Glc-H <sub>2</sub> O)] <sup>+</sup> ,<br>587[M+H-Glc] <sup>+</sup> ,407[M+H-2Glc] <sup>+</sup>                                                                                                                 |
| 61 | 11.61 | Ginsenoside Rb3/Rc                  | C <sub>53</sub> H <sub>90</sub> O <sub>22</sub> | 1077[M-H] <sup>-</sup> ,956[M-H-3HO-C <sub>5</sub> H <sub>10</sub> ] <sup>-</sup> ,<br>945[M-H-(Xyl-H <sub>2</sub> O)] <sup>-</sup> ,<br>783[M-H-(Xyl-H <sub>2</sub> O)-(Glc-H <sub>2</sub> O)] <sup>-</sup> ,<br>459[M-H-(Xyl-H <sub>2</sub> O)-3(Glc-H <sub>2</sub> O)] <sup>-</sup> |
| 62 | 11.95 | Araloside A                         | C <sub>47</sub> H <sub>74</sub> O <sub>18</sub> | 925[M-H] <sup>-</sup> ,881[M-H-C <sub>3</sub> H <sub>8</sub> ] <sup>-</sup> ,<br>845[M-H-2HO-CH <sub>2</sub> O <sub>2</sub> ] <sup>-</sup> ,763[M-H-Xyl] <sup>-</sup>                                                                                                                  |

|    |       |                                         |                       |                                                                                                                                                                                                                                                                                                                                                                                                                                                                                                                                                                                                                                                                                                                                                                                                            |
|----|-------|-----------------------------------------|-----------------------|------------------------------------------------------------------------------------------------------------------------------------------------------------------------------------------------------------------------------------------------------------------------------------------------------------------------------------------------------------------------------------------------------------------------------------------------------------------------------------------------------------------------------------------------------------------------------------------------------------------------------------------------------------------------------------------------------------------------------------------------------------------------------------------------------------|
| 63 | 12.40 | Ginsenoside Rg4/Rg5/Rg6/Rk              | $C_{42}H_{70}O_{12}$  | 767[M+H] <sup>+</sup> , 749[M+H-H <sub>2</sub> O] <sup>+</sup> , 605[M+H-(Glc-H <sub>2</sub> O)] <sup>+</sup> ,<br>587[M+H-Glc] <sup>+</sup> , 407[M+H-2Glc] <sup>+</sup><br>931[M-H] <sup>-</sup> , 859[M-H-4H <sub>2</sub> O] <sup>-</sup> , 770[M-H-(Glc-H <sub>3</sub> O)] <sup>-</sup> ,                                                                                                                                                                                                                                                                                                                                                                                                                                                                                                              |
| 64 | 12.76 | Notoginsenoside R1                      | $C_{47}H_{80}O_{18}$  | 681[M-H-C <sub>5</sub> H <sub>10</sub> O <sub>4</sub> -2CH <sub>3</sub> -C <sub>6</sub> H <sub>14</sub> ] <sup>-</sup> , 425[M-H-2Glc-C <sub>5</sub> H <sub>6</sub> O <sub>5</sub> ] <sup>-</sup>                                                                                                                                                                                                                                                                                                                                                                                                                                                                                                                                                                                                          |
| 65 | 12.78 | Senegin VI                              | $C_{80}H_{120}O_{39}$ | 1703[M-H] <sup>-</sup> , 1673[M-H-CH <sub>2</sub> O] <sup>-</sup>                                                                                                                                                                                                                                                                                                                                                                                                                                                                                                                                                                                                                                                                                                                                          |
| 66 | 12.93 | Onjisaponin L                           | $C_{86}H_{128}O_{43}$ | 1847[M-H] <sup>-</sup> , 1703[M-H-HMG] <sup>-</sup>                                                                                                                                                                                                                                                                                                                                                                                                                                                                                                                                                                                                                                                                                                                                                        |
| 67 | 13.06 | Onjisaponin O                           | $C_{77}H_{116}O_{37}$ | 1631[M-H] <sup>-</sup> , 1601[M-H-CH <sub>2</sub> O] <sup>-</sup>                                                                                                                                                                                                                                                                                                                                                                                                                                                                                                                                                                                                                                                                                                                                          |
| 68 | 13.35 | Senegin III                             | $C_{75}H_{112}O_{35}$ | 1571[M-H] <sup>-</sup> , 1541[M-H-CH <sub>2</sub> O] <sup>-</sup>                                                                                                                                                                                                                                                                                                                                                                                                                                                                                                                                                                                                                                                                                                                                          |
| 69 | 13.76 | Acoronene                               | $C_{15}H_{22}O_2$     | 235[M+H] <sup>+</sup> , 217[M+H-CH <sub>6</sub> ] <sup>+</sup> ,<br>189[M+H-C <sub>3</sub> H <sub>10</sub> ] <sup>+</sup> , 119[M+H-C <sub>7</sub> H <sub>16</sub> O] <sup>+</sup>                                                                                                                                                                                                                                                                                                                                                                                                                                                                                                                                                                                                                         |
| 70 | 13.89 | Onjisaponin F                           | $C_{75}H_{112}O_{36}$ | 1587[M-H] <sup>-</sup> , 1557[M-H-CH <sub>2</sub> O] <sup>-</sup><br>319[M+H] <sup>+</sup> , 303[M+H-CH <sub>4</sub> ] <sup>+</sup> ,<br>275[M+H-C <sub>3</sub> H <sub>8</sub> ] <sup>+</sup> , 258[M+H-C <sub>3</sub> H <sub>9</sub> O] <sup>+</sup> ,<br>317[M-H] <sup>-</sup> , 302[M-H-CH <sub>3</sub> ] <sup>-</sup> , 287[M-H-2CH <sub>3</sub> ] <sup>-</sup> ,<br>259[M-H-3CH <sub>2</sub> -O] <sup>-</sup> , 215[M-H-C <sub>5</sub> H <sub>9</sub> O <sub>2</sub> ] <sup>-</sup><br>387[M+H] <sup>+</sup> , 373[M+H-CH <sub>2</sub> ] <sup>+</sup> , 355[M+H-2CH <sub>4</sub> ] <sup>+</sup> ,                                                                                                                                                                                                     |
| 71 | 14.14 | 1,6-Dihydroxy-3,5, 7-trimethoxyxanthone | $C_{16}H_{14}O_7$     | 235[M+H-CH <sub>3</sub> -C <sub>8</sub> H <sub>9</sub> O <sub>2</sub> ] <sup>+</sup> , 193[M+H-C <sub>8</sub> H <sub>9</sub> O <sub>2</sub> -C <sub>3</sub> H <sub>5</sub> O] <sup>+</sup><br>209[M+H] <sup>+</sup> , 194[M+H-CH <sub>3</sub> ] <sup>+</sup> , 179[M+H-2CH <sub>3</sub> ] <sup>+</sup> ,<br>151[M+H-3CH <sub>3</sub> -CH] <sup>+</sup> , 121[M+H-3CH <sub>3</sub> -C <sub>3</sub> H <sub>7</sub> ] <sup>+</sup><br>179[M+H] <sup>+</sup> , 163[M+H-CH <sub>4</sub> ] <sup>+</sup> ,<br>149[M+H-CH <sub>2</sub> O] <sup>+</sup> , 121[M+H-C <sub>2</sub> H <sub>2</sub> O <sub>2</sub> ] <sup>+</sup><br>499[M-H] <sup>-</sup> , 481[M-H-H <sub>2</sub> O] <sup>-</sup> ,<br>419[M-H-C <sub>6</sub> H <sub>8</sub> ] <sup>-</sup> , 389[M-H-C <sub>7</sub> H <sub>10</sub> -O] <sup>-</sup> |
| 72 | 14.24 | Eudesmin                                | $C_{22}H_{26}O_6$     | 209[M+H] <sup>+</sup> , 194[M+H-CH <sub>3</sub> ] <sup>+</sup> , 179[M+H-2CH <sub>3</sub> ] <sup>+</sup> ,<br>151[M+H-3CH <sub>3</sub> -CH] <sup>+</sup> , 121[M+H-3CH <sub>3</sub> -C <sub>3</sub> H <sub>7</sub> ] <sup>+</sup><br>179[M+H] <sup>+</sup> , 163[M+H-CH <sub>4</sub> ] <sup>+</sup> ,<br>149[M+H-CH <sub>2</sub> O] <sup>+</sup> , 121[M+H-C <sub>2</sub> H <sub>2</sub> O <sub>2</sub> ] <sup>+</sup><br>499[M-H] <sup>-</sup> , 481[M-H-H <sub>2</sub> O] <sup>-</sup> ,<br>419[M-H-C <sub>6</sub> H <sub>8</sub> ] <sup>-</sup> , 389[M-H-C <sub>7</sub> H <sub>10</sub> -O] <sup>-</sup>                                                                                                                                                                                               |
| 73 | 14.43 | $\alpha/\gamma$ -Asarone                | $C_{12}H_{16}O_3$     | 209[M+H] <sup>+</sup> , 194[M+H-CH <sub>3</sub> ] <sup>+</sup> , 179[M+H-2CH <sub>3</sub> ] <sup>+</sup> ,<br>151[M+H-3CH <sub>3</sub> -CH] <sup>+</sup> , 121[M+H-3CH <sub>3</sub> -C <sub>3</sub> H <sub>7</sub> ] <sup>+</sup><br>793[M-H-2Glc] <sup>-</sup> , 587[M-H-Glc-CO <sub>2</sub> ] <sup>-</sup> ,                                                                                                                                                                                                                                                                                                                                                                                                                                                                                             |
| 74 | 14.49 | p-Hydroxy methyl cinnamate              | $C_{10}H_{10}O_3$     | 569[M-H-Glc-CO <sub>2</sub> -H <sub>2</sub> O] <sup>-</sup> , 523[M-H-Glc-2CHO <sub>2</sub> -H <sub>2</sub> O] <sup>-</sup><br>487[M+H] <sup>+</sup> , 407[M+H-H <sub>2</sub> O-CH <sub>2</sub> O <sub>2</sub> -CH <sub>4</sub> ] <sup>+</sup> ,<br>201[M+H-C <sub>19</sub> H <sub>26</sub> O <sub>2</sub> ] <sup>+</sup> , 159[M+H-C <sub>8</sub> H <sub>12</sub> O <sub>2</sub> -                                                                                                                                                                                                                                                                                                                                                                                                                        |
| 75 | 14.97 | Poricoic acid H                         | $C_{31}H_{48}O_5$     |                                                                                                                                                                                                                                                                                                                                                                                                                                                                                                                                                                                                                                                                                                                                                                                                            |
| 76 | 14.97 | $\alpha/\gamma$ -Asarone                | $C_{12}H_{16}O_3$     |                                                                                                                                                                                                                                                                                                                                                                                                                                                                                                                                                                                                                                                                                                                                                                                                            |
| 77 | 15.04 | Ginsenoside Roa                         | $C_{54}O_{86}O_{24}$  |                                                                                                                                                                                                                                                                                                                                                                                                                                                                                                                                                                                                                                                                                                                                                                                                            |
| 78 | 15.76 | Poricoic acid G                         | $C_{30}H_{46}O_5$     |                                                                                                                                                                                                                                                                                                                                                                                                                                                                                                                                                                                                                                                                                                                                                                                                            |

|    |       |                                                                       |                      |                                                                                                                                                                 |
|----|-------|-----------------------------------------------------------------------|----------------------|-----------------------------------------------------------------------------------------------------------------------------------------------------------------|
|    |       |                                                                       |                      | $C_{11}H_{24}O_2]^+$ ,                                                                                                                                          |
|    |       |                                                                       |                      | 485[M-H] <sup>-</sup> ,425[M-H-CH <sub>4</sub> -CO <sub>2</sub> ] <sup>-</sup> ,                                                                                |
|    |       |                                                                       |                      | 387[M-H-C <sub>6</sub> H <sub>9</sub> -OH] <sup>-</sup> ,369[M-H-C <sub>6</sub> H <sub>12</sub> -CO <sub>2</sub> ] <sup>-</sup>                                 |
|    |       |                                                                       |                      | 497[M-H] <sup>-</sup> ,479[M-H-H <sub>2</sub> O] <sup>-</sup> ,                                                                                                 |
| 79 | 16.38 | Poricoic acid A                                                       | $C_{31}H_{46}O_5$    | 435[M-H-H <sub>2</sub> O-CO <sub>2</sub> ] <sup>-</sup> ,419[M-H-CH <sub>4</sub> CO <sub>2</sub> -H <sub>2</sub> O] <sup>-</sup>                                |
|    |       |                                                                       |                      | 945[M-H] <sup>-</sup> ,899[M-H-CH <sub>2</sub> O <sub>2</sub> ] <sup>-</sup> ,                                                                                  |
| 80 | 17.23 | Ginsenoside Rd                                                        | $C_{48}H_{82}O_{18}$ | 631[M-H-Glc-2CH <sub>2</sub> -C <sub>8</sub> H <sub>10</sub> ] <sup>-</sup> ,                                                                                   |
|    |       |                                                                       |                      | 571[M-H-C <sub>3</sub> H <sub>15</sub> -Glc-(Glc-2H <sub>2</sub> O)] <sup>-</sup> ,                                                                             |
|    |       |                                                                       |                      | 221[M+H] <sup>+</sup> ,193[M+H-2CH <sub>2</sub> ] <sup>+</sup> ,                                                                                                |
| 81 | 17.28 | $\alpha$ -Santalol                                                    | $C_{15}H_{24}O$      | 190[M+H-CH <sub>3</sub> O] <sup>+</sup> ,165[M+H-C <sub>3</sub> H <sub>4</sub> O] <sup>+</sup>                                                                  |
|    |       |                                                                       |                      | 401[M+H] <sup>+</sup> ,369[M+H-2CH <sub>4</sub> ] <sup>+</sup> ,                                                                                                |
| 82 | 17.33 | Deoxygomisin A                                                        | $C_{23}H_{28}O_6$    | 208[M+H-C <sub>10</sub> H <sub>10</sub> O <sub>3</sub> ] <sup>+</sup> ,193[M+H-C <sub>12</sub> H <sub>16</sub> O <sub>3</sub> ] <sup>+</sup>                    |
|    |       |                                                                       |                      | 497[M-H] <sup>-</sup> ,467[M-H-2O] <sup>-</sup> ,                                                                                                               |
| 83 | 17.40 | 25-Hydroxyporicoic acid C                                             | $C_{31}H_{46}O_5$    | 423[M-H-C <sub>2</sub> H <sub>6</sub> -CO <sub>2</sub> ] <sup>-</sup>                                                                                           |
|    |       |                                                                       |                      | 165[M+H] <sup>+</sup> ,149[M+H-CH <sub>4</sub> ] <sup>+</sup> ,135[M+H-2CH <sub>3</sub> ] <sup>+</sup> ,                                                        |
| 84 | 17.47 | Propyl benzoate                                                       | $C_{10}H_{12}O_2$    | 121[M+H-C <sub>3</sub> H <sub>8</sub> ] <sup>+</sup> ,107[M+H-C <sub>3</sub> H <sub>6</sub> O] <sup>+</sup>                                                     |
|    |       |                                                                       |                      | 373[M+H] <sup>+</sup> ,327[M+H-3CH <sub>3</sub> -H] <sup>+</sup> ,                                                                                              |
| 85 | 17.52 | Veraguensin                                                           | $C_{22}H_{28}O_5$    | 295[M+H-3CH <sub>3</sub> -OCH <sub>3</sub> -2H] <sup>+</sup> ,235[M+H--2CH <sub>3</sub> O-C <sub>6</sub> H <sub>4</sub> ] <sup>+</sup>                          |
|    |       |                                                                       |                      | 151[M+H] <sup>+</sup> ,135[M+H-CH <sub>4</sub> ] <sup>+</sup> ,                                                                                                 |
| 86 | 17.55 | 2-Methoxy-4-vinylphenol                                               | $C_9H_{10}O_2$       | 107[M+H-C <sub>3</sub> H <sub>8</sub> ] <sup>+</sup>                                                                                                            |
|    |       |                                                                       |                      | 417[M+H] <sup>+</sup> ,224[M+H-C <sub>11</sub> H <sub>13</sub> O <sub>3</sub> ] <sup>+</sup> ,                                                                  |
| 87 | 17.59 | Gomisin A                                                             | $C_{23}H_{28}O_7$    | 193[M+H-C <sub>12</sub> H <sub>16</sub> O <sub>4</sub> ] <sup>+</sup> ,165[M+H-C <sub>14</sub> H <sub>20</sub> O <sub>4</sub> ] <sup>+</sup>                    |
|    |       |                                                                       |                      | 471[M+H] <sup>+</sup> ,453[M+H-H <sub>2</sub> O] <sup>+</sup> ,                                                                                                 |
|    |       |                                                                       |                      | 407[M+H-CH <sub>2</sub> O <sub>2</sub> -H <sub>2</sub> O] <sup>+</sup> ,313[M+H-C <sub>8</sub> H <sub>12</sub> O <sub>2</sub> -H <sub>2</sub> O] <sup>+</sup> , |
| 88 | 17.62 | 3 $\beta$ ,16 $\alpha$ -Dihydroxylanosta-7,9(11),24-trien-21-oic acid | $C_{30}H_{46}O_4$    | 469[M-H] <sup>-</sup> ,407[M-H-CO <sub>2</sub> -H <sub>2</sub> O] <sup>-</sup> ,                                                                                |
|    |       |                                                                       |                      | 367[M-H-C <sub>6</sub> H <sub>12</sub> -H <sub>2</sub> O] <sup>-</sup>                                                                                          |
|    |       |                                                                       |                      | 483[M-H] <sup>-</sup> ,439[M-H-CO <sub>2</sub> ] <sup>-</sup> ,                                                                                                 |
| 89 | 17.66 | Poricoic acid B                                                       | $C_{30}H_{44}O_5$    | 409[M-H-CO <sub>2</sub> -2CH <sub>2</sub> ] <sup>-</sup> ,367[M-H-2CO <sub>2</sub> -2CH <sub>2</sub> ] <sup>-</sup>                                             |
|    |       |                                                                       |                      | 649[M-H] <sup>-</sup> ,603[M-H-CH <sub>2</sub> O <sub>2</sub> ] <sup>-</sup> ,471[M-H-C <sub>6</sub> H <sub>10</sub> O <sub>6</sub> ] <sup>-</sup>              |
| 90 | 17.66 | Fal-laxsaponin A                                                      | $C_{35}H_{54}O_{11}$ |                                                                                                                                                                 |
| 91 | 17.90 | 6,7-Dehydroporicoic acid H                                            | $C_{31}H_{46}O_5$    | 497[M-H] <sup>-</sup> ,479[M-H-H <sub>2</sub> O] <sup>-</sup> ,                                                                                                 |

|     |       |                                                              |                   |                                                                                                                                                                                                                                                                                                                                                                                                                                                                                                                                                                         |
|-----|-------|--------------------------------------------------------------|-------------------|-------------------------------------------------------------------------------------------------------------------------------------------------------------------------------------------------------------------------------------------------------------------------------------------------------------------------------------------------------------------------------------------------------------------------------------------------------------------------------------------------------------------------------------------------------------------------|
| 92  | 17.97 | 16-Deoxyporicoic acid B                                      | $C_{30}H_{44}O_4$ | 453[M-H-2CH <sub>3</sub> -CH <sub>2</sub> ] <sup>-</sup> ,423[M-H-C <sub>2</sub> H <sub>6</sub> -CO <sub>2</sub> ] <sup>-</sup><br>469[M+H] <sup>+</sup> ,451[M+H-H <sub>2</sub> O] <sup>+</sup> ,<br>311[M+H-C <sub>8</sub> H <sub>12</sub> O <sub>2</sub> -H <sub>2</sub> O] <sup>+</sup> ,293[M+H-C <sub>8</sub> H <sub>12</sub> O <sub>2</sub> -CH <sub>8</sub> O] <sup>+</sup><br>467[M-H] <sup>-</sup> ,423[M-H-CO <sub>2</sub> ] <sup>-</sup> ,<br>407[M-H-CO <sub>2</sub> -CH <sub>4</sub> ] <sup>-</sup> ,374[M-H-C <sub>7</sub> H <sub>9</sub> ] <sup>-</sup> |
| 93  | 18.00 | cis/trans-Methylisoeugenol                                   | $C_{11}H_{14}O_2$ | 179[M+H] <sup>+</sup> ,165[M+H-CH <sub>2</sub> ] <sup>+</sup> ,<br>151[M+H-2CH <sub>2</sub> ] <sup>+</sup> ,121[M+H-2CH <sub>3</sub> -2CH-2H] <sup>+</sup>                                                                                                                                                                                                                                                                                                                                                                                                              |
| 94  | 18.04 | Tumulolic acid                                               | $C_{31}H_{50}O_4$ | 485[M-H] <sup>-</sup> ,441[M-H-CO <sub>2</sub> ] <sup>-</sup> ,423[M-H-CO <sub>2</sub> -H <sub>2</sub> O] <sup>-</sup><br>417[M+H] <sup>+</sup> ,403[M+H-CH <sub>2</sub> ] <sup>+</sup> ,385[M+H-2CH <sub>4</sub> ] <sup>+</sup> ,                                                                                                                                                                                                                                                                                                                                      |
| 95  | 18.04 | Bisasaricin                                                  | $C_{24}H_{32}O_6$ | 249[M+H-3CH <sub>3</sub> O-C <sub>6</sub> H <sub>5</sub> ] <sup>+</sup> ,209[M+H-3CH <sub>3</sub> O-C <sub>6</sub> H <sub>5</sub> -C <sub>3</sub> H <sub>4</sub> ] <sup>+</sup>                                                                                                                                                                                                                                                                                                                                                                                         |
| 96  | 18.05 | δ-Cadinene/β-Caryophyllene/Isocaryophyllen                   | $C_{15}H_{24}$    | 205[M+H] <sup>+</sup> ,161[M+H-2CH <sub>3</sub> -CH <sub>2</sub> ] <sup>+</sup> ,<br>151[M+H-C <sub>4</sub> H <sub>6</sub> ] <sup>+</sup> ,133[M+H-2CH <sub>3</sub> -3CH <sub>2</sub> ] <sup>+</sup>                                                                                                                                                                                                                                                                                                                                                                    |
| 97  | 18.09 | cis/trans-Methylisoeugenol                                   | $C_{11}H_{14}O_2$ | 179[M+H] <sup>+</sup> ,165[M+H-CH <sub>2</sub> ] <sup>+</sup> ,<br>151[M+H-2CH <sub>2</sub> ] <sup>+</sup> ,121[M+H-2CH <sub>3</sub> -2CH-2H] <sup>+</sup>                                                                                                                                                                                                                                                                                                                                                                                                              |
| 98  | 18.16 | 25-Methoxyporicoic acid                                      | $C_{32}H_{48}O_6$ | 527[M-H] <sup>-</sup> ,481[M-H-CH <sub>2</sub> O <sub>2</sub> ] <sup>-</sup> ,<br>431[M-H-C <sub>6</sub> H <sub>8</sub> O] <sup>-</sup> ,413[M-H-C <sub>7</sub> H <sub>14</sub> O] <sup>-</sup>                                                                                                                                                                                                                                                                                                                                                                         |
| 99  | 18.17 | δ-Cadinene/β-Caryophyllene/Isocaryophyllen                   | $C_{15}H_{24}$    | 205[M+H] <sup>+</sup> ,161[M+H-2CH <sub>3</sub> -CH <sub>2</sub> ] <sup>+</sup> ,<br>151[M+H-C <sub>4</sub> H <sub>6</sub> ] <sup>+</sup> ,133[M+H-2CH <sub>3</sub> -3CH <sub>2</sub> ] <sup>+</sup><br>513[M+H] <sup>+</sup> ,495[M+H-H <sub>2</sub> O] <sup>+</sup> ,                                                                                                                                                                                                                                                                                                 |
| 100 | 18.19 | 3β-Hydroxy-16α-acetoxy-lanosta-7,9 (11),24-trien-21-oic acid | $C_{32}H_{48}O_5$ | 453[M+H-COCH <sub>3</sub> -OH] <sup>+</sup> ,<br>355[M+H-C <sub>8</sub> H <sub>12</sub> O <sub>2</sub> -H <sub>2</sub> O] <sup>+</sup> ,<br>295[M+H-C <sub>8</sub> H <sub>12</sub> O <sub>2</sub> -CH <sub>4</sub> O <sub>2</sub> -H <sub>2</sub> O] <sup>+</sup> ,<br>483[M+H] <sup>+</sup> ,465[M+H-H <sub>2</sub> O] <sup>+</sup> ,<br>419[M+H-C <sub>3</sub> H <sub>10</sub> -H <sub>2</sub> O] <sup>+</sup> ,309[M+H-C <sub>9</sub> H <sub>16</sub> O <sub>2</sub> -H <sub>2</sub> O] <sup>+</sup> ,                                                               |
| 101 | 18.31 | Daedaleanic acid A                                           | $C_{31}H_{46}O_4$ | 481[M-H] <sup>-</sup> ,437[M-H-CO <sub>2</sub> ] <sup>-</sup> ,<br>421[M-H-C <sub>3</sub> H <sub>8</sub> -O] <sup>-</sup> ,403[M-H-C <sub>3</sub> H <sub>8</sub> -2HO] <sup>-</sup>                                                                                                                                                                                                                                                                                                                                                                                     |
| 102 | 18.49 | Dehydroeburiconic acid                                       | $C_{31}H_{46}O_3$ | 467[M+H] <sup>+</sup> ,449[M+H-H <sub>2</sub> O] <sup>+</sup> ,<br>311[M+H-C <sub>9</sub> H <sub>16</sub> O <sub>2</sub> ] <sup>+</sup> ,293[M+H-C <sub>10</sub> H <sub>22</sub> O <sub>2</sub> ] <sup>+</sup>                                                                                                                                                                                                                                                                                                                                                          |
| 103 | 18.50 | Dehydrotu-mulosic acid                                       | $C_{31}H_{48}O_4$ | 483[M-H] <sup>-</sup> ,437[M-H-CH <sub>2</sub> O <sub>2</sub> ] <sup>-</sup> ,<br>421[M-H-CO <sub>2</sub> -H <sub>2</sub> O] <sup>-</sup> ,337[M-H-C <sub>6</sub> H <sub>12</sub> -CO <sub>2</sub> -                                                                                                                                                                                                                                                                                                                                                                    |

|     |       |                                                            |                   |                                                                                                                                                                                                                                 |
|-----|-------|------------------------------------------------------------|-------------------|---------------------------------------------------------------------------------------------------------------------------------------------------------------------------------------------------------------------------------|
| 104 | 18.51 | $\delta$ -Cadinene/ $\beta$ -Caryophyllene/Isocaryophyllen | $C_{15}H_{24}$    | $H_2O]^-$<br>205[M+H] <sup>+</sup> ,161[M+H-2CH <sub>3</sub> -CH <sub>2</sub> ] <sup>+</sup> ,<br>151[M+H-C <sub>4</sub> H <sub>6</sub> ] <sup>+</sup> ,133[M+H-2CH <sub>3</sub> -3CH <sub>2</sub> ] <sup>+</sup>               |
| 105 | 18.71 | 2,6-Di-sec-butyl-4-methylphenol                            | $C_{15}H_{24}O$   | 221[M+H] <sup>+</sup> ,203[M+H-CH <sub>6</sub> ] <sup>+</sup> ,<br>193[M+H-CH <sub>3</sub> -CH] <sup>+</sup> ,133[M+H-CH <sub>3</sub> -CH-4CH <sub>3</sub> ] <sup>+</sup>                                                       |
| 106 | 19.07 | Poricoic acid AE                                           | $C_{33}H_{50}O_5$ | 525[M-H] <sup>-</sup> ,479[M-H-C <sub>2</sub> H <sub>6</sub> O] <sup>-</sup> ,<br>465[M-H-C <sub>2</sub> H <sub>4</sub> O <sub>2</sub> ] <sup>-</sup> ,355[M-H-C <sub>9</sub> H <sub>14</sub> O <sub>2</sub> -O] <sup>-</sup>   |
| 107 | 19.99 | Pachymic acid                                              | $C_{33}H_{52}O_5$ | 527[M-H] <sup>-</sup> ,483[M-H-C <sub>2</sub> H <sub>4</sub> O] <sup>-</sup> ,<br>465[M-H-C <sub>2</sub> H <sub>4</sub> O-H <sub>2</sub> O] <sup>-</sup> ,221[M-H-C <sub>18</sub> H <sub>26</sub> O <sub>4</sub> ] <sup>-</sup> |

---

Note: Glc:  $\beta$ -D-glucose; Xyl:  $\beta$ -D-xylose; Fru:  $\beta$ -D-fructose; Rha:  $\alpha$ -L-rhamnose; Api:  $\beta$ -D-Apiose ; HMG: 3s-3-hydroxy-3-methyl-5-pentanoic acid
